# Supplementary material for: TNFAIP8L1 and FLT1 polymorphisms alter the susceptibility to cervical cancer amongst uyghur females in China
Source: PubMed Central journal article supplement (PMC6639457; doi:10.1042/bsr20191155), 2019-07-19
Supplement: bsr20191155_Supp1.pdf [file bsr20191155_Supp1.pdf]

Supplementary table 1 False-Positive Report Probability Values for associations between the risk of cervical cancer and the frequency of genotypes and haplotypes

| Genotype/haplotype                     | OR (95% CI)        | <i>p</i> -value | Statistical power | Prior probability |              |       |       |        |
|----------------------------------------|--------------------|-----------------|-------------------|-------------------|--------------|-------|-------|--------|
|                                        |                    |                 |                   | 0.25              | 0.1          | 0.01  | 0.001 | 0.0001 |
| <b>rs9917028</b>                       |                    |                 |                   |                   |              |       |       |        |
| A vs. G                                | 0.80(0.65 - 0.98)  | 0.032           | 0.961             | <b>0.085</b>      | 0.219        | 0.755 | 0.969 | 0.997  |
| AA vs. GG                              | 0.64 (0.42 - 0.99) | 0.044           | 0.866             | <b>0.135</b>      | 0.318        | 0.837 | 0.981 | 0.998  |
| <b>rs10426502</b>                      |                    |                 |                   |                   |              |       |       |        |
| A vs. G                                | 0.53(0.33 - 0.84)  | 0.007           | 0.598             | <b>0.033</b>      | <b>0.094</b> | 0.533 | 0.920 | 0.991  |
| GA vs. GG                              | 0.47 (0.28 - 0.76) | 0.003           | 0.400             | <b>0.015</b>      | <b>0.045</b> | 0.339 | 0.838 | 0.981  |
| GA-AA vs. GG                           | 0.49 (0.30 - 0.79) | 0.004           | 0.467             | <b>0.021</b>      | <b>0.062</b> | 0.420 | 0.880 | 0.987  |
| <b>rs1060555</b>                       |                    |                 |                   |                   |              |       |       |        |
| G vs. C                                | 0.78(0.62 - 0.97)  | 0.026           | 0.921             | <b>0.071</b>      | <b>0.187</b> | 0.716 | 0.962 | 0.996  |
| CG vs. CC                              | 0.70 (0.52 - 0.93) | 0.015           | 0.632             | <b>0.040</b>      | <b>0.112</b> | 0.581 | 0.933 | 0.993  |
| CG-GG vs. CC                           | 0.70 (0.53 - 0.93) | 0.012           | 0.632             | <b>0.040</b>      | <b>0.112</b> | 0.581 | 0.933 | 0.993  |
| <b>Haplotype: rs10426502 rs1060555</b> |                    |                 |                   |                   |              |       |       |        |
| AG vs. GG                              | 1.94 (1.20 - 3.13) | 0.007           | 0.550             | <b>0.035</b>      | <b>0.098</b> | 0.544 | 0.923 | 0.992  |
| GC vs. GG                              | 1.30 (1.03 - 1.63) | 0.026           | 0.892             | <b>0.065</b>      | <b>0.172</b> | 0.695 | 0.958 | 0.996  |

OR: odds ratio, CI: confidence interval.

*p* values were calculated with wald-test. *p* < 0.05 indicates statistical significance.

Statistical power was calculated using the number of observations in the subgroup and the OR and *p*-values in this table
